# Supplementary material
Source: PubMed Central journal article supplement (PMC3955162)
Supplement: NIHMS560006-supplement-01.pdf [file NIHMS560006-supplement-01.pdf]

Supplementary Table I

| Strain name | Genotype                                                                                                                      |
|-------------|-------------------------------------------------------------------------------------------------------------------------------|
| EG4085      | <i>snf-3(ox354) II; egl-8(sa47) V; oxEx771[B0348(egl-8<sup>+</sup>); rol-6(d); Pmyo-2::GFP]</i>                               |
| EG4094      | <i>egl-8(sa47) V; oxEx771[B0348(egl-8<sup>+</sup>); rol-6(sd); Pmyo-2::GFP]</i>                                               |
| EG4769      | <i>snf-3(ox354) II; egl-8(sa47) V; oxEx1067[snf-3::GFP(pPDI14.24); Pmyo-2::mCherry; Punc-122::GFP]</i>                        |
| EG5005      | <i>snf-3(ox354) II; egl-8(sa28) V</i>                                                                                         |
| EG5006      | <i>snf-3(ox354) II; egl-8(n488) V</i>                                                                                         |
| EG5051      | <i>snf-3(ox354) II ; egl-8(sa47) V; oxIs12[Punc-47::GFP, lin-15+] X; oxEx1208[Pdpy-30::snf-3::mCherry; Pmyo-2::mCherry]</i>   |
| EG5052      | <i>snf-3(ox354) II; egl-8(sa47) V; oxIs12[Punc-47::GFP, lin-15(+)] X; oxEx1209[Ppdi-2::snf-3::mCherry]</i>                    |
| EG5059      | <i>snf-3(ox354) II; egl-8(sa47) V; oxIs12[Punc-47::GFP, lin-15+] X; oxEx1219[Prab-3::egl-8-mCherry; Pmyo-2::GFP; ladder]</i>  |
| EG5060      | <i>snf-3(ox354) II; egl-8(sa47) V; oxIs12[Punc-47::GFP; lin-15+] X; oxEx1220[Pdpy-30::egl-8-mcherry; Pmyo-2::GFP; ladder]</i> |
| EG5124      | <i>snf-3(ok293) II; egl-8(sa47) V</i>                                                                                         |
| EG5485      | <i>unc-22(ox431) IV</i>                                                                                                       |
| EG6315      | <i>snf-3(ok293) II</i> from RM2716 outcrossed twice against N2                                                                |
| EG6326      | <i>acr-23(ox429) V</i>                                                                                                        |
| EG6327      | <i>snf-3(ox354) II; acr-23(ox429) V</i>                                                                                       |
| EG6328      | <i>snf-3(ox354) II; acr-23(ok2804) V</i>                                                                                      |
| EG6544      | <i>snf-3(ox354) II; egl-8(sa47) V; acr-23(ok2804) V</i>                                                                       |
| EG6566      | <i>acr-23(ox429) V</i>                                                                                                        |
| EG6785      | <i>lin-15(n765ts) X; oxEx1595[acr-23(I301N); lin-15(+)]</i>                                                                   |
| EG6786      | <i>lin-15(n765ts) X; oxEx1596[acr-23(I301N); lin-15(+)]</i>                                                                   |
| EG6879      | <i>snf-3(ox354) II; egl-8(sa47) V; oxIs12[Punc-47::GFP; lin-15(+)]X; oxEx1179[Pvha-6::snf-3::mCherry]</i>                     |
| EG6881      | <i>snf-3(ox354) II; egl-8(sa47) V; oxIs12[Punc-47::GFP; lin-15(+)] X; oxEx1246[Podr-4::snf-3::mCherry]</i>                    |
| EG6882      | <i>snf-3(ox354) II; egl-8(sa47) V; oxIs12[Punc-47::GFP; lin-15(+)] X; oxEx1245[Punc-17::snf-3::mCherry]</i>                   |
| EG6885      | <i>snf-3(ox354) II</i> outcrossed seven times against N2                                                                      |
| EG6887      | <i>snf-3(ox354) II; egl-8(sa47) V</i>                                                                                         |
| EG6888      | <i>lin-15(n765ts) X; oxEx1614[Psnf-3::GFP::snf-3::let-858; lin-15(+); Pmyo-2::mCherry; Punc-122::GFP]</i>                     |
| EG6958      | <i>snf-3(ox354) II; egl-8(sa47) V; oxIs12[Punc-47::GFP; lin-15(+)] X; oxEx1618[Pgtl-3::snf-3::mCherry]</i>                    |
| EG6957      | <i>snf-3(ox354) II; egl-8(sa47) V; oxIs12[Punc-47::GFP; lin-15(+)] X; oxEx1617[Psnf-3::snf-3::mCherry]</i>                    |
| EG7080      | <i>snf-3(ok293) II; acr-23(ox429) V</i>                                                                                       |
| EG7081      | <i>snf-3(ox354) II; egl-8(sa47) V</i> outcrossed 4 times against N2                                                           |
| EG7083      | <i>unc-54(e190) I; snf-3(ox354) II; egl-8(sa47) V</i>                                                                         |
| EG7084      | <i>unc-54(e1092) I; snf-3(ox354) II; egl-8(sa47) V</i>                                                                        |
| EG7345      | <i>lin-15(n765ts) X; oxEx1790[Pmyo-3::acr-23(I301N); lin-15(+)]</i>                                                           |

|        |                                                                                                                                |
|--------|--------------------------------------------------------------------------------------------------------------------------------|
| EG7346 | <i>lin-15(n765ts) X; oxEx1791[Pmyo-3::acr-23(I301N); lin-15(+)]</i>                                                            |
| EG7347 | <i>lin-15(n765ts) X; oxEx1792[Pmec-7::acr-23(I301N); lin-15(+)]</i>                                                            |
| EG7348 | <i>lin-15(n765ts) X; oxEx1793[Pmec-7::acr-23(I301N); lin-15(+)]</i>                                                            |
| EG7416 | <i>lin-15(n765ts) X; oxEx1790[Pacr-23::mCherry::let-858; lin-15(+); Pmyo-2::GFP]</i>                                           |
| EG7513 | <i>snf-3(ox354) II; egl-8(sa47) V</i> outcrossed 11 times against N2                                                           |
| EG7681 | <i>snf-3(ox354) II; egl-8(sa47) V; oxIs12[Punc-47::GFP; lin-15(+)] X; oxEx1219[Prab-3::egl-8-mCherry; Pmyo-2::GFP; ladder]</i> |
| EG7682 | <i>snf-3(ox354) II; egl-8(sa47) V; oxIs12[Punc-47::GFP; lin-15(+)] X; oxEx1236[Pdpy-7::egl-8cDNA::mCherry; Pmyo-2::GFP]</i>    |
| EG7685 | <i>snf-3(ox354) II; egl-8(sa47) V; oxEx1906[Pvha-6::egl-8::mCherry; Pmyo2::GFP]</i>                                            |
| EG7686 | <i>snf-3(ox354) II; egl-8(sa47) V; oxEx1906[Pvha-6::egl-8::mCherry; Pmyo2::GFP]</i>                                            |
| EG7710 | <i>acr-23(ok2804) V</i> from RB2119 outcrossed 4 times against N2                                                              |
| EG7711 | <i>snf-3(ox354) II; egl-8(sa47) V; oxEx1909[Punc-17::egl-8::mCherry; Pmyo-2::GFP]</i>                                          |
| EG7712 | <i>snf-3(ox354) II; egl-8(sa47) V; oxEx1909[Punc-17::egl-8::mCherry; Pmyo-2::GFP]</i>                                          |
| EG8006 | <i>snf-3(ox354) II; egl-8(sa47) V; oxEx1925[Pvit-2::snf-3::mCherry; Pmyo-2::GFP]</i>                                           |
| EG8007 | <i>snf-3(ox354) II; egl-8(sa47) V; oxEx1925[Pvit-2::snf-3::mCherry; Pmyo-2::GFP]</i>                                           |
| EG8033 | <i>egl-8(sa47) V</i> outcrossed 10 times against N2                                                                            |
| EG8093 | <i>oxEx1208[Pdpy-30::snf-3::mCherry; Pmyo-2::mCherry]</i>                                                                      |
| EG8095 | <i>acr-23(ox429) V</i> outcrossed 4 times against N2                                                                           |
| EG8099 | <i>acr-23(ox429) V; oxEx1959[Pacr-23::acr-23::acr-23 3'utr; Pmyo-2::GFP]</i>                                                   |
| EG8100 | <i>acr-23(ox429) V; oxEx1959[Pacr-23::acr-23::acr-23 3'utr; Pmyo-2::GFP]</i>                                                   |
| EG8103 | <i>acr-23(ox429) V; oxEx1962[Pmec-7::acr-23::let-858utr; Pmyo-2::mCherry; Punc-122::mCherry]</i>                               |
| EG8105 | <i>acr-23(ox429) V; oxEx1962[Pmec-7::acr-23::let-858utr; Pmyo-2::mCherry; Punc-122::mCherry]</i>                               |
| EG8106 | <i>acr-23(ox429) V; oxEx1965[Prab-3::acr-23-gfp::let-858utr; Pmyo-2::mCherry]</i>                                              |
| EG8108 | <i>acr-23(ox429) V; oxEx1965[Prab-3::acr-23-gfp::let-858utr; Pmyo-2::mCherry]</i>                                              |
| EG8109 | <i>acr-23(ox429) V; oxEx1969[Pmyo-3::acr-23::GFP::let-858utr; Pmyo-2::mCherry]</i>                                             |
| EG8110 | <i>acr-23(ox429) V; oxEx1969[Pmyo-3::acr-23::GFP::let-858utr; Pmyo-2::mCherry]</i>                                             |
| JT47   | <i>egl-8(sa47) V</i>                                                                                                           |
| RB2119 | <i>acr-23(ok2804) V</i>                                                                                                        |
| RM2716 | <i>snf-3(ok293) II; dpy-11(e224) V</i>                                                                                         |
